# Supplementary material for: Advances in hydrogen sulphide utilisation: phase transfer catalysed selective reduction of nitronaphthalene
Source: Royal Society of Chemistry journal article supplement (doi:10.1039/c5ra19884d), 2015-01-01
Supplement: c5ra19884d1.pdf [file c5ra19884d1.pdf]

Supplementary Information for

**Advances in Hydrogen Sulphide Utilization: Phase Transfer Catalysed  
Selective Reduction of Nitronaphthalene**

*Ujjal Mondal, Sujit Sen\*, Gaurav Singh*

Catalysis Research Laboratory, Department of Chemical Engineering, National Institute of  
Technology, Rourkela – 769008, India

\*Corresponding author: Tel: +91-9938246590; Fax: +91-661-2462022; Email: sensujit@nitrkl.ac.in

Figure S1: GC spectra showing formation of 1-naphthylamine from reactant 1-Nitronaphthalene in  
solvent toluene. S3

Figure S2: Mass spectra for all the peaks shown in Figure S3 S4

Figure S3: Mass spectra of product 1-naphthylamine S5

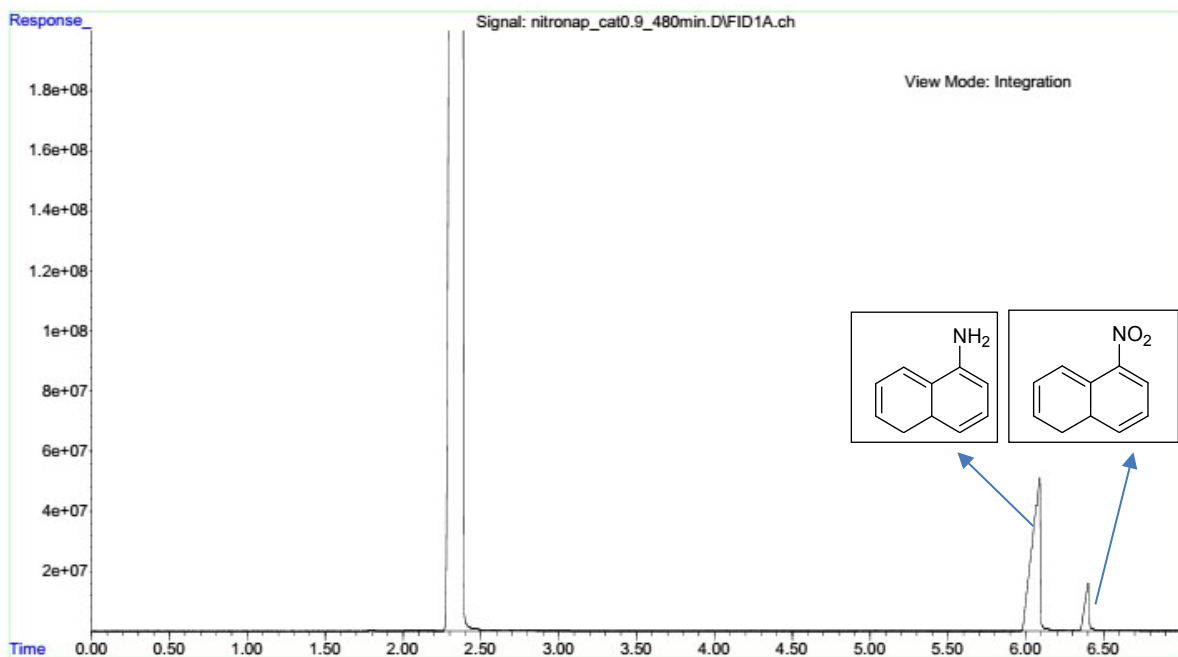

Figure S1: GC Spectra showing formation of 1-naphthylamine from reactant 1-Nitronaphthalene in solvent toluene.

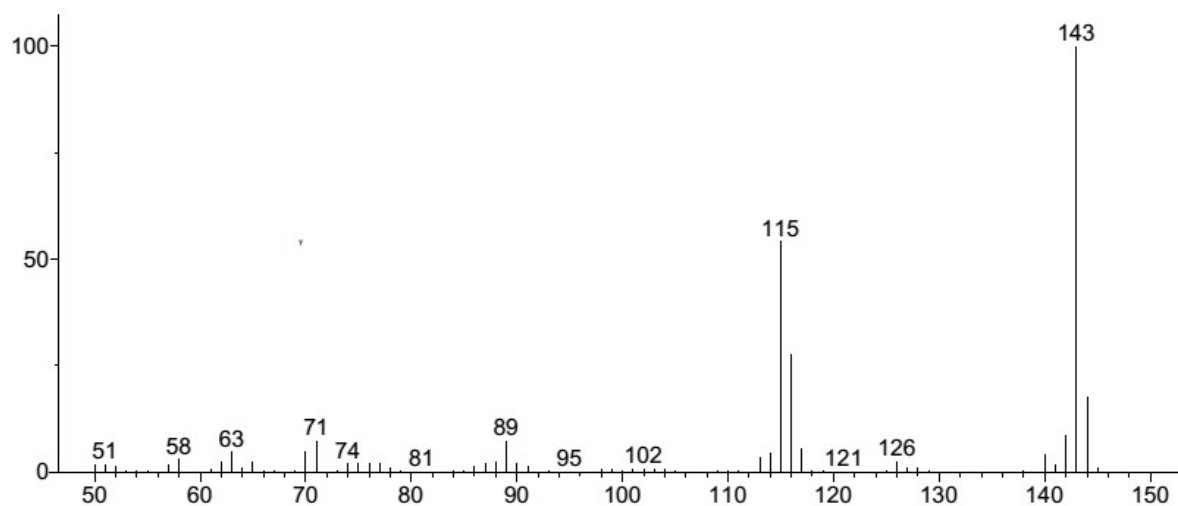

Figure S2: Mass spectra for all the peaks shown in Figure S3

Hit 1 : 1-Naphthalenamine  
C<sub>10</sub>H<sub>9</sub>N; MF: 962; RMF: 964; Prob 59.3%; CAS: 134-32-7; Lib: replib; ID: 21017.

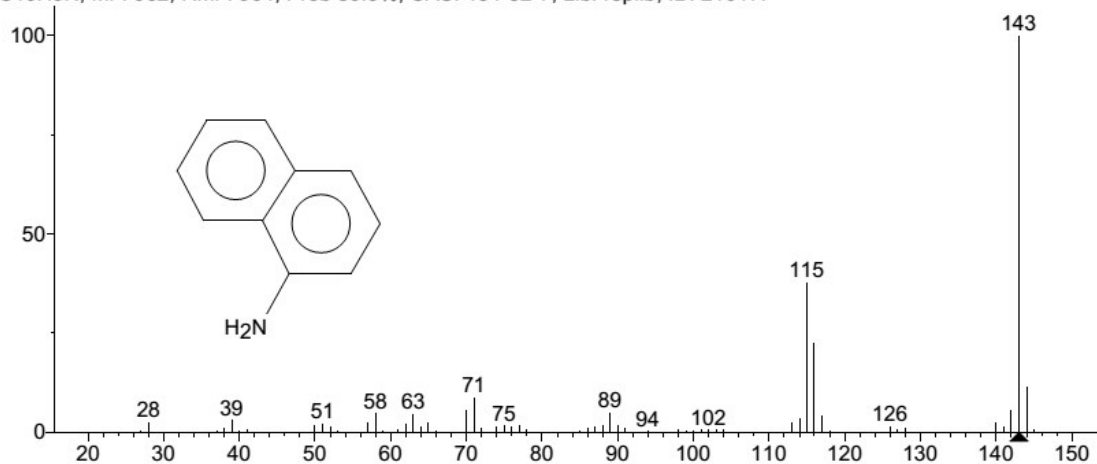

Figure S3: Mass spectra of product 1-naphthylamine
